# Supplementary material
Source: MDPI journal article supplement (https://www.mdpi.com/2073-4441/12/9/2327)
Supplement: s1 [file s1]

# Understory Limits Surface Runoff and Soil Loss in Teak Tree Plantations of Northern Lao PDR

Layheang SONG <sup>1,2</sup>, Laurie BOITHIAS <sup>1,\*</sup>, Oloth SENGTAHEUANGHOUNG <sup>3</sup>, Chantha OEURNG <sup>2</sup>, Christian VALENTIN <sup>4</sup>, Bounthan SOUKSAVATH <sup>5</sup>, Phabvilay SOUNYAFONG <sup>6</sup>, Anneke de ROUW <sup>4</sup>, Bounsamay SOULILEUTH <sup>6</sup>, Norbert SILVERA <sup>4</sup>, Bounchanh LATTANAVONGKOT <sup>5</sup>, Alain PIERRET <sup>6</sup> and Olivier RIBOLZI <sup>1</sup>

## Supplementary Materials

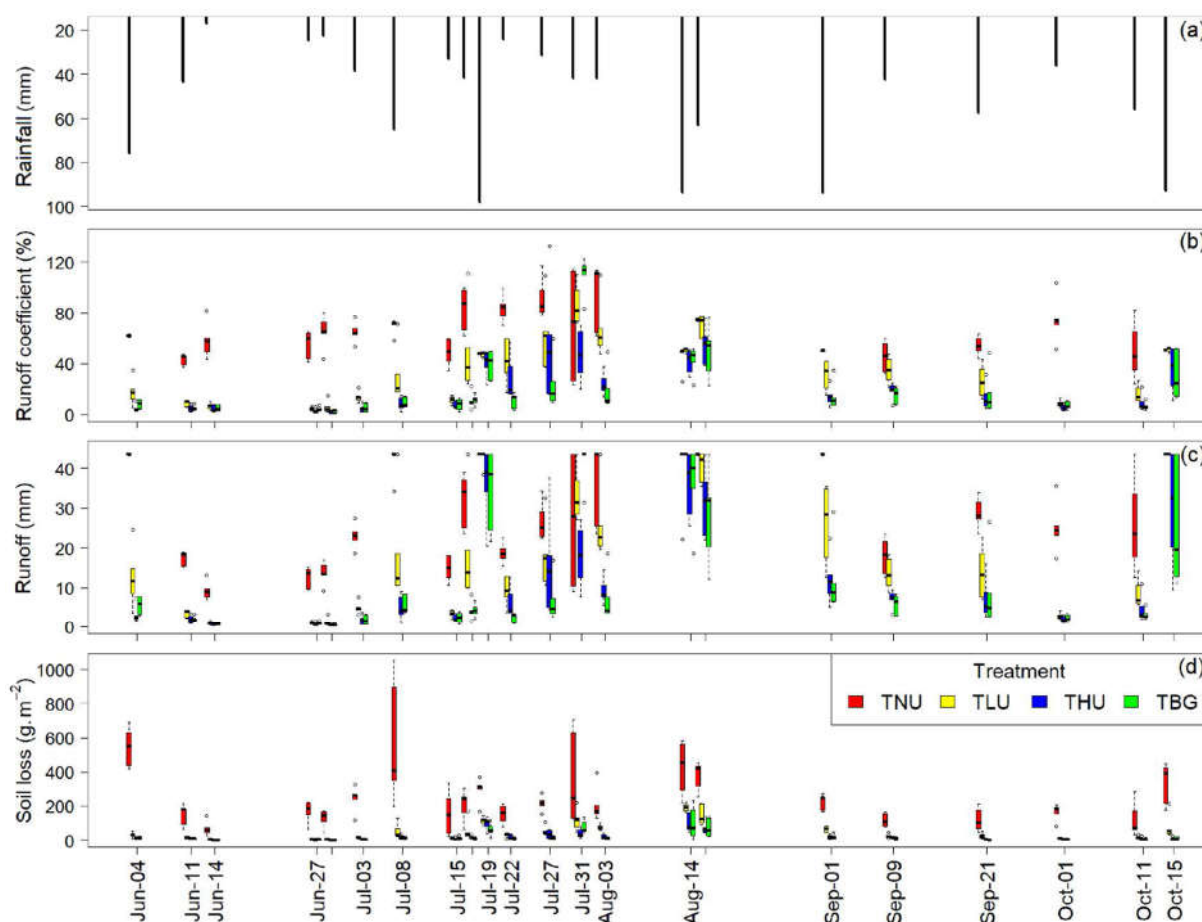

**Figure S1.** (a) Cumulated rainfall (mm). (b) boxplots of runoff coefficient (%). (c) boxplot of surface runoff (mm). (d) boxplot of soil loss ( $\text{g} \cdot \text{m}^{-2}$ ) in each treatment measured from 4 June to 15 October 2017, in Ban Kokngew, Luang Prabang Province, Lao People's Democratic Republic. TNU: teak with no understory; TLU: teak with low density of understory; THU: teak with high density of understory; TBG: teak with broom grass. Each rainfall bar represents the accumulated rainfall over the period previous to the sampling. Each boxplot contains the extreme of the lower whisker (dashed line), the lower hinge (thin line), the median (bold line), the upper hinge (thin line), and the extreme of the upper whisker (dashed line). The whiskers extend to the most extreme data point, which is no more than 1.5-times the interquartile range from the box.

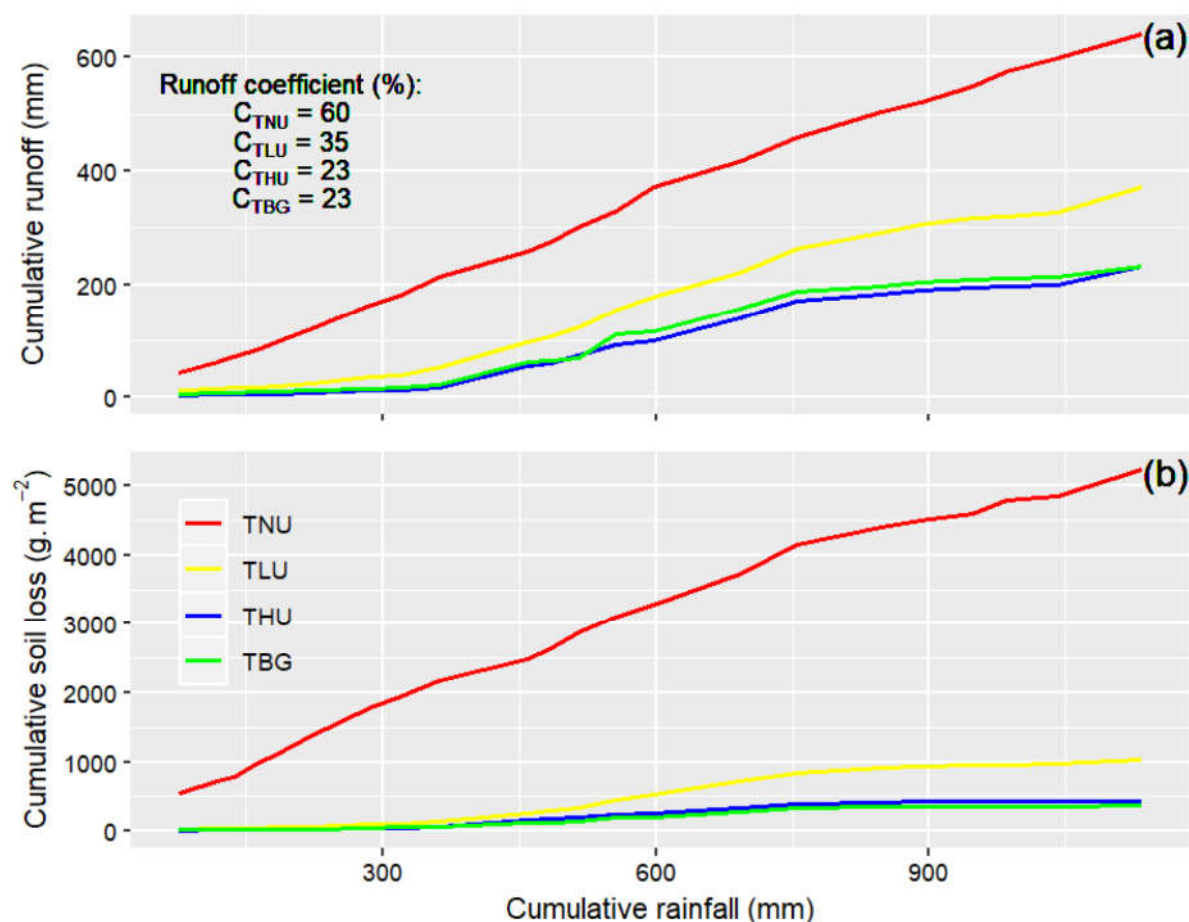

**Figure S2.** (a) Cumulative surface runoff (mm) versus cumulative rainfall and runoff coefficient (%), total surface runoff divided by total rainfall), and (b) cumulative soil loss ( $\text{g} \cdot \text{m}^{-2}$ ) versus cumulative rainfall (mm), measured from 4 June to 15 October 2017, in Ban Kokngew, Luang Prabang Province, Lao People's Democratic Republic. TNU: teak with no understory; TLU: teak with low density of understory; THU: teak with high density of understory; TBG: teak with broom grass.

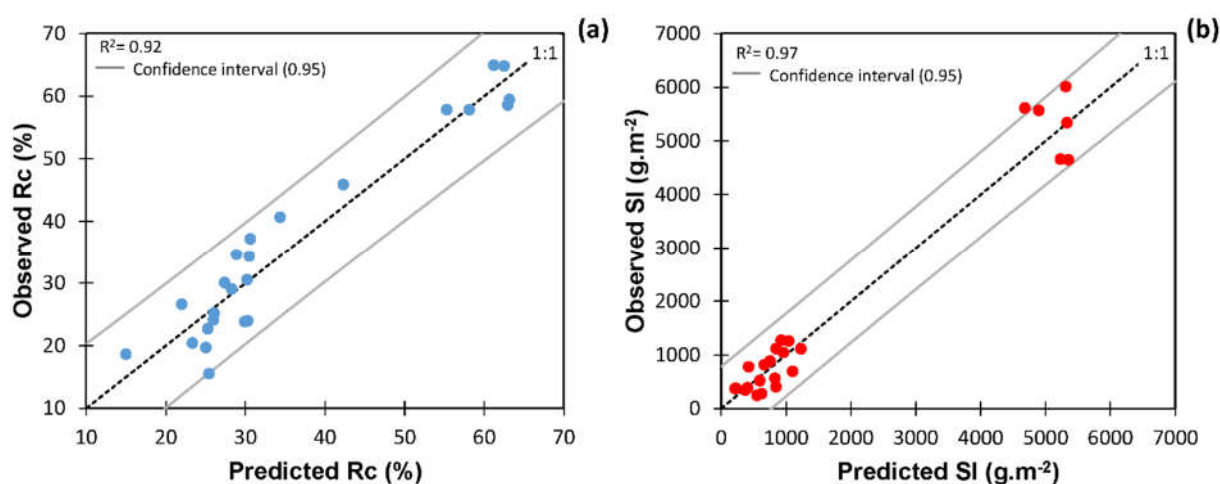

**Figure S3.** Observed and modelled seasonal runoff coefficient (Rc; in %) and seasonal soil loss (SI; in  $\text{g} \cdot \text{m}^{-2}$ ) from partial least squares (PLS) regression method. Observed Rc and SI were measured from 4 June to 15 October 2017, in Ban Kokngew, Luang Prabang Province, Lao People's Democratic Republic.

**Table S1.** Coefficients of each variables in the runoff coefficient (%) and soil loss ( $\text{g}\cdot\text{m}^{-2}$ ) partial least squares (PLS) models. SD: standard deviation; Fa: free aggregates; Fg: free gravel; Tc: total crust; Cha: charcoals; Res: residues; Wor: worm casts; Alg: algae; Mos: mosses; Ped: pedestals; Und: understory.

| Variable | Runoff coefficient (%) |    |             |             | Soil loss ( $\text{g}\cdot\text{m}^{-2}$ ) |          |             |             |
|----------|------------------------|----|-------------|-------------|--------------------------------------------|----------|-------------|-------------|
|          | Coefficient            | SD | Lower limit | Upper limit | Coefficient                                | SD       | Lower limit | Upper limit |
| Constant | 43.53                  | 3  | 37          | 50          | 2916.84                                    | 166      | 2573        | 3261        |
| Fa       | -0.10                  | 0  | 0           | 0           | -18.46                                     | 3        | -25         | -12         |
| Fg       | 0.31                   | 0  | 0           | 1           | 53.96                                      | 16       | 22          | 86          |
| Tc       | 0.07                   | 0  | 0           | 0           | 10.35                                      | 1        | 8           | 13          |
| Cha      | 54.79                  | 42 | -32         | 142         | 7692.58                                    | 396<br>5 | -531        | 15916       |
| Res      | -0.09                  | 0  | 0           | 0           | -12.40                                     | 1        | -15         | -10         |
| Wor      | -0.74                  | 0  | -1          | 0           | -26.93                                     | 16       | -60         | 7           |
| Alg      | 41.56                  | 21 | -1          | 84          | 3191.76                                    | 736      | 1666        | 4718        |
| Mos      | 3.41                   | 5  | -7          | 14          | -84.62                                     | 83       | -256        | 87          |
| Ped      | 0.13                   | 0  | 0           | 0           | 16.11                                      | 3        | 10          | 22          |
| Und      | -0.13                  | 0  | 0           | 0           | -14.34                                     | 1        | -17         | -12         |

Constants and coefficients of each variable of the proposed model of runoff coefficient and soil loss using PLS model.
